# Supplementary material for: Electrocatalytic reduction of oxygen at platinum nanoparticles dispersed on electrochemically reduced graphene oxide/PEDOT:PSS composites
Source: Royal Society of Chemistry journal article supplement (doi:10.1039/d0ra05232a), 2020-01-01
Supplement: d0ra05232a1.pdf [file d0ra05232a1.pdf]

### Supplementary Information for

## Electrocatalytic reduction of oxygen at platinum nanoparticles dispersed on electrochemically reduced graphene oxide/ PEDOT:PSS composites

Teklewold Getachew,<sup>\*a</sup> Fitsum Addis,<sup>a</sup> Solomon Mehretie, Hin-Lap Yip, Ruidong Xia<sup>b</sup> and Shimelis Admassie<sup>a,b</sup>

### Determination of collection efficiency(N)

The value of N for an ideal RRDE is independent of the reaction and rotational rate ( $\omega$ ) but dependent only by its geometry parameters. However, when a thick catalyst layer is loaded on the disk, the geometry of the RRDE changes; therefore, it is necessary to calibrate the N value of the RRDE with the catalyst. The calibration of N is carried out using a simple one-electron transfer redox pair reaction [1].

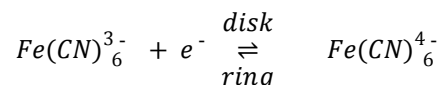

The ring and the disk currents in the negative sweep direction ( $10 \text{ mV s}^{-1}$ ) at a constant ring potential of 1.3 V for the determination of collection efficiency on rGO (1:0) are shown in S1. The N values of the RRDE loaded with catalysts (S2) are lower than the bare RRDE (0.37) as supplied by the manufacturer. The N values of 2:1 (0.35), 1:1 (0.36) and 1:2 (0.36) are close to 0.37 but even lower values for 1:0 (0.31), 1:3 (0.30), and 1:5 (0.32) were recorded.

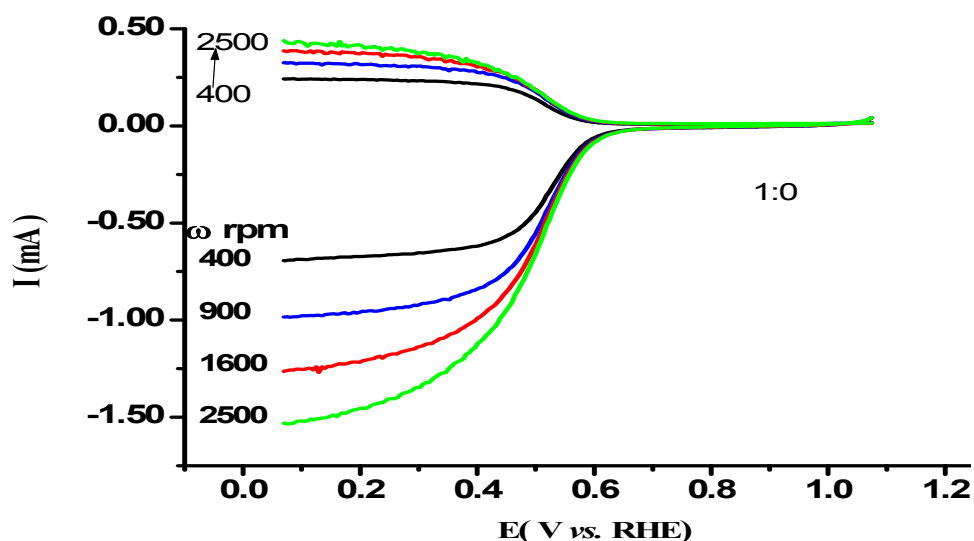

**Fig. S1** Ring ( $\text{Fe}^{2+} \rightarrow \text{Fe}^{3+} + e^-$ ) and disk ( $\text{Fe}^{3+} + e^- \rightarrow \text{Fe}^{2+}$ ) currents for the determination of the collection efficiency on 1:0 in 1 M  $\text{KNO}_3$  supporting electrolyte with 10 mM  $\text{K}_3\text{Fe}(\text{CN})_6$ . Negative sweeps at  $10 \text{ mV s}^{-1}$ ;  $E_{\text{Ring}} = 1.3 \text{ V}$ .

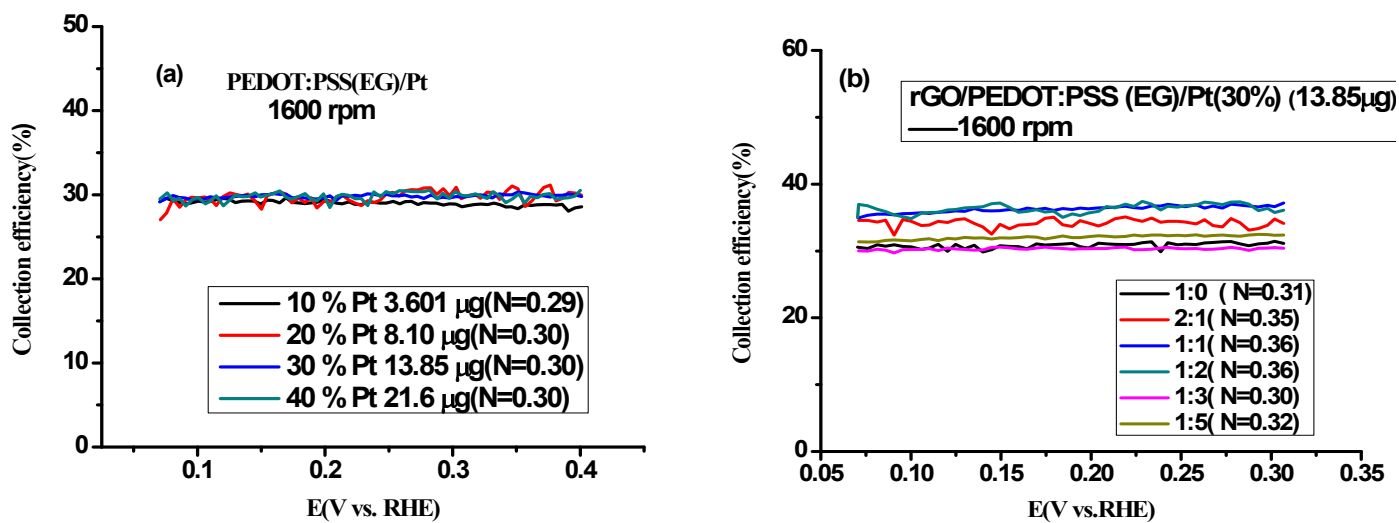

**Fig. S2** Variation of the collection efficiency with potential and catalyst loading for the different catalysts (a) PEDOT:PSS(EG)/Pt, and (c) rGO/PEDOT:PSS(EG)/Pt(30%)

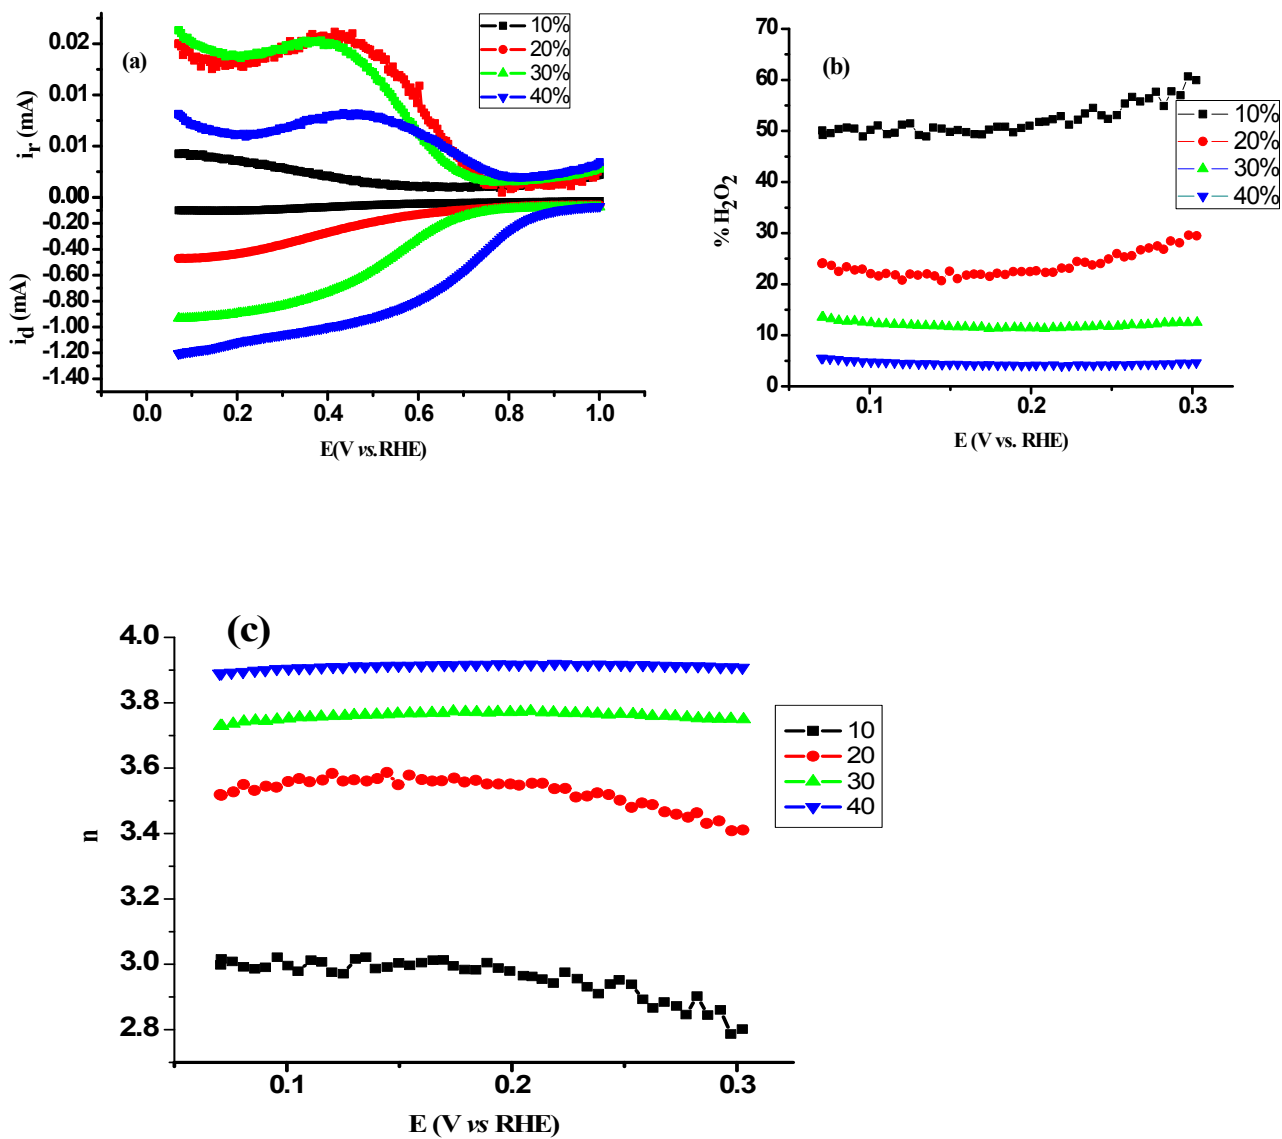

**Fig S3:**(a) RRDE voltammograms, (b) % H<sub>2</sub>O<sub>2</sub> formation and (c) electron transfer number (n) as a function of the disk potential for various platinum loadings PEDOT:PSS(EG) at 1600 rpm in 0.1 M HClO<sub>4</sub> solution.

**Table S1 Kinetic parameters for oxygen reduction on PEDOT:PSS/Pt, PEDOT:PSS/Pt(EG), and rGO/PEDOT:PSS(EG)/Pt(30%) in 0.1 M HClO<sub>4</sub> at 1600 rpm.**

| Electrocatalyst                | Pt                                | A <sub>r</sub> (cm <sup>2</sup> ) | ECAS<br>(m <sup>2</sup> g <sup>-1</sup> ) | SA                       |       | MA                       |        |
|--------------------------------|-----------------------------------|-----------------------------------|-------------------------------------------|--------------------------|-------|--------------------------|--------|
|                                | loading<br>(mg cm <sup>-2</sup> ) |                                   |                                           | (μA cm <sup>-2</sup> Pt) |       | (mA mgPt <sup>-1</sup> ) |        |
|                                |                                   |                                   |                                           | 0.81V                    | 0.86V | 0.81 V                   | 0.86 V |
| PEDOT:PSS/Pt 30%               | 0.071                             | 0.41                              | 2.93                                      | 194.5                    | 41.3  | 5.8                      | 1.2    |
| PEDOT:PSS/Pt 40%               | 0.12                              | 0.526                             | 2.32                                      | 284.9                    | 33.4  | 6.6                      | 0.7    |
| PEDOT:PSS(EG)/Pt 30%           | 0.071                             | 0.526                             | 3.8                                       | 228.4                    | 49.8  | 8.7                      | 1.9    |
| PEDOT:PSS(EG)/Pt 40%           | 0.12                              | 0.61                              | 2.68                                      | 287.3                    | 83.7  | 7.71                     | 2.24   |
| rGO/PEDOT:PSS(EG) (1:0)/Pt 30% | 0.071                             | 0.49                              | 3.57                                      | 212.4                    | 96.5  | 7.8                      | 3.4    |
| rGO/PEDOT:PSS(EG) (2:1)/Pt 30% | 0.071                             | 0.47                              | 3.36                                      | 514.7                    | 158.6 | 17.3                     | 5.3    |
| rGO/PEDOT:PSS(EG) (1:1)/Pt 30% | 0.071                             | 0.69                              | 4.96                                      | 419                      | 134.8 | 20.8                     | 6.7    |
| rGO/PEDOT:PSS(EG) (1:2)/Pt 30% | 0.071                             | 0.65                              | 4.72                                      | 472                      | 162   | 22.3                     | 7.6    |
| rGO/PEDOT:PSS(EG) (1:3)/Pt 30% | 0.071                             | 0.78                              | 5.63                                      | 284.8                    | 102.3 | 16.02                    | 5.8    |
| rGO/PEDOT:PSS(EG) (1:5)/Pt 30% | 0.071                             | 0.77                              | 5.58                                      | 347.5                    | 129.7 | 19.4                     | 7.2    |

1. R. Zhou, Y. Zheng, M. Jaroniec, S. Qiao, *ACS Catal.* 2016, 6, 4720-4728.
